# Supplementary material
Source: publisher site journal article supplement (https://www.dovepress.com/article/395896)
Supplement: Supplementary file 1 [file get_supplementary_file.php]

**Supplementary data**

| **Supplementary Table S1.** Results of the univariable logistic regression model for ischemic stroke in the training sample | | | |
| --- | --- | --- | --- |
| Variables | Univariable analysis | | |
| Estimate | OR (95%CI) | *P* value |
| Age, per year increment | 0.085 | 1.09 (1.07-1.11) | < 0.001 |
| Sex | | | |
| female | reference | | |
| male | 0.929 | 2.53 (1.8-3.55) | < 0.001 |
| Cigarette smoking | | | |
| no | reference | | |
| yes | 1.067 | 2.91 (2.08-4.07) | < 0.001 |
| Alcohol consumption | | | |
| no | reference | | |
| yes | 0.558 | 1.75 (1.21-2.53) | 0.003 |
| Family history of stroke | | | |
| no | reference | | |
| yes | 1.245 | 3.47 (2.32-5.20) | < 0.001 |
| History of hypertension | | | |
| no | reference | | |
| yes | 0.598 | 1.82 (1.30-2.55) | < 0.001 |
| History of diabetes | | | |
| no | reference | | |
| yes | 1.991 | 7.33 (4.63-11.58) | < 0.001 |
| SBP, per mmHg increment | 0.043 | 1.04 (1.04-1.05) | < 0.001 |
| DBP, per mmHg increment | 0.011 | 1.01 (1.00-1.03) | 0.163 |
| HDL cholesterol, per mg/dL increment | -0.104 | 0.90 (0.88-0.92) | < 0.001 |
| LDL cholesterol, per mg/dL increment | 0.001 | 1.00 (0.99-1.06) | 0.888 |
| Fasting plasma glucose, per mmol/L increment | 0.366 | 1.44 (1.32-1.58) | < 0.001 |
| Total cholesterol, per mg/dL increment | - 0.007 | 0.99 (0.99-1.00) | 0.004 |
| Triglycerides, per mg/dL increment | 0.001 | 1.00(1.00-1.01) | 0.141 |
| Serum uric acid, per umol/L increment | 0.004 | 1.00(1.00-1.01) | < 0.001 |
| SBP: systolic blood pressure; DBP: diastolic blood pressure; HDL: high-density lipoprotein; LDL: Low-density lipoprotein. | | | |

| **Supplementary Table S2.** The evaluation on the cut-off value of the diagnostic model | | |
| --- | --- | --- |
| Evaluation indicators | Training subsample | Testing subsample |
| Cut-off value | The diagnostic score was 0.190 | |
| Validity | | |
| Sensitivity | 0.792 | 0.729 |
| Specificity | 0.904 | 0.901 |
| Youden’s index | 0.697 | 0.630 |
| Positive likelihood ratio | 8.285 | 7.377 |
| Negative likelihood ratio | 0.229 | 0.301 |
| Predictive value | | |
| Positive predictive value | 0.125 | 0.113 |
| Negative predictive value | 0.996 | 0.995 |
